# Supplementary material for: Combined Treatment with Curcumin and Ferulic Acid Suppressed the Aβ-Induced Neurotoxicity More than Curcumin and Ferulic Acid Alone
Source: MDPI journal article supplement (doi:10.3390/ijms23179685), 2022-08-26
Supplement: s1 [file s1]

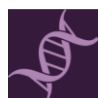

Suppl. Table S1. The p-values for all pairwise comparisons using the Tukey test for A $\beta$ <sub>1-40</sub> aggregation assay

|                     | Aβ <sub>1-40</sub> | 1 μM Cur | 5 μM Cur | 10 μM Cur | 1 μM FA  | 10 μM FA | 20 μM FA | 50 μM FA | 1 μM Cur + 10 μM FA | 5 μM Cur +10 μM FA |
|---------------------|--------------------|----------|----------|-----------|----------|----------|----------|----------|---------------------|--------------------|
| Aβ <sub>1-40</sub>  | 1.0000             | < 0.0001 | < 0.0001 | 0.9196    | 0.8446   | 0.3851   | 0.7101   | 0.0884   | < 0.0001            |                    |
| 1 μM Cur            |                    | < 0.0001 | < 0.0001 | 0.7232    | 0.523    | 0.1348   | 0.3925   | 0.1242   | < 0.0001            |                    |
| 5 μM Cur            |                    |          | 0.5175   | < 0.0001  | < 0.0001 | < 0.0001 | < 0.0001 | 0.0004   | 0.9875              |                    |
| 10 μM Cur           |                    |          |          | < 0.0001  | < 0.0001 | < 0.0001 | < 0.0001 | < 0.0001 | 0.9788              |                    |
| 1 μM FA             |                    |          |          |           | 1.0000   | 0.9997   | 1.0000   | 0.0072   | < 0.0001            |                    |
| 10 μM FA            |                    |          |          |           |          | 0.9969   | 1.0000   | 0.0008   | < 0.0001            |                    |
| 20 μM FA            |                    |          |          |           |          |          | 1.0000   | < 0.0001 | < 0.0001            |                    |
| 50 μM FA            |                    |          |          |           |          |          |          | 0.0008   | < 0.0001            |                    |
| 1 μM Cur + 10 μM FA |                    |          |          |           |          |          |          |          | < 0.0001            |                    |
| 5 μM Cur + 10 μM FA |                    |          |          |           |          |          |          |          | < 0.0001            |                    |

Thioflavin T (ThT) fluorescence assay was used to compare the effects of Cur, FA, and the combination of both on the aggregation rate of A $\beta$ <sub>1-40</sub> peptide at 360 min. A $\beta$ <sub>1-40</sub> is aggregation of the A $\beta$ <sub>1-40</sub> peptide alone. Statistical significances are in boldface.

Suppl. Table S2. The p-values for all pairwise comparisons using the Tukey test for A $\beta$ <sub>1-42</sub> aggregation assay

|                     | Aβ1-42 | 1 μM Cur | 5 μM Cur | 10 μM Cur | 1 μM FA  | 10 μM FA | 20 μM FA | 50 μM FA | 1 μM Cur + 10 μM FA | 5 μM Cur + 10 μM FA |
|---------------------|--------|----------|----------|-----------|----------|----------|----------|----------|---------------------|---------------------|
| Aβ1-42              |        | 0.0004   | < 0.0001 | < 0.0001  | 0.9821   | 0.9884   | 0.5242   | 0.572    | < 0.0001            | < 0.0001            |
| 1 μM Cur            |        |          | < 0.0001 | < 0.0001  | < 0.0001 | < 0.0001 | < 0.0001 | < 0.0001 | 0.9121              | < 0.0001            |
| 5 μM Cur            |        |          |          | < 0.0001  | < 0.0001 | < 0.0001 | < 0.0001 | < 0.0001 | < 0.0001            | 0.0842              |
| 10 μM Cur           |        |          |          |           | < 0.0001 | < 0.0001 | < 0.0001 | < 0.0001 | < 0.0001            | < 0.0001            |
| 1 μM FA             |        |          |          |           |          | 1.0000   | 0.9988   | 0.9997   | < 0.0001            | < 0.0001            |
| 10 μM FA            |        |          |          |           |          |          | 0.9821   | 0.9911   | < 0.0001            | < 0.0001            |
| 20 μM FA            |        |          |          |           |          |          |          | 1.0000   | < 0.0001            | < 0.0001            |
| 50 μM FA            |        |          |          |           |          |          |          |          | < 0.0001            | < 0.0001            |
| 1 μM Cur + 10 μM FA |        |          |          |           |          |          |          |          |                     | < 0.0001            |
| 5 μM Cur + 10 μM FA |        |          |          |           |          |          |          |          |                     |                     |

Thioflavin T (ThT) fluorescence assay was used to compare the effects of Cur, FA, and the combination of both on the aggregation rate of A $\beta$ <sub>1-42</sub> peptide at 120 min. A $\beta$ <sub>1-42</sub> is aggregation of the A $\beta$ <sub>1-42</sub> peptide alone. Statistical significances are in boldface.

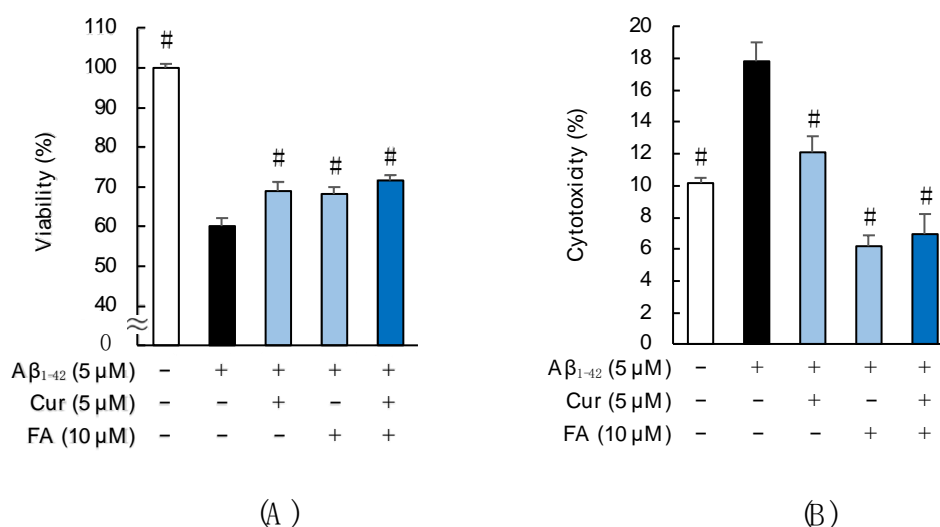

Suppl. Figure S1. Effect of Cur, FA, or a combination of both on the viability and cytotoxicity in Aβ<sub>1-42</sub>-stimulated SH-SY5Y cells. (A) The viability in Aβ<sub>1-42</sub>-stimulated SH-SY5Y cells was evaluated using MTT assay. Cell viability of SH-SY5Y cells exposed with 5 μM Aβ<sub>1-42</sub> and treated with Aβ<sub>1-42</sub> + 5 μM Cur, Aβ<sub>1-42</sub> + 10 μM FA or Aβ<sub>1-42</sub> + Cur + FA for 3 hr. (B) The cytotoxicity in Aβ<sub>1-42</sub>-stimulated SH-SY5Y cells was evaluated using EthD-1 Cell assay. The cytotoxicity of SH-SY5Y cells exposed with 5 μM Aβ<sub>1-42</sub> and treated with Aβ<sub>1-42</sub> + 5 μM Cur, Aβ<sub>1-42</sub> + 10 μM FA or Aβ<sub>1-42</sub> + Cur + FA for 3 hr. +: inclusion of 5 μM Aβ<sub>1-42</sub>, 1 μM Cur, 10 μM FA, respectively, -: non-inclusion. The p-values in ANOVA were < 0.001. Each value expresses the mean + S.E.M. of at least 3 in-dependent experiments. #, p < 0.01; Aβ<sub>1-42</sub> exposed cells versus the other treated cells (n = 6, Tukey)

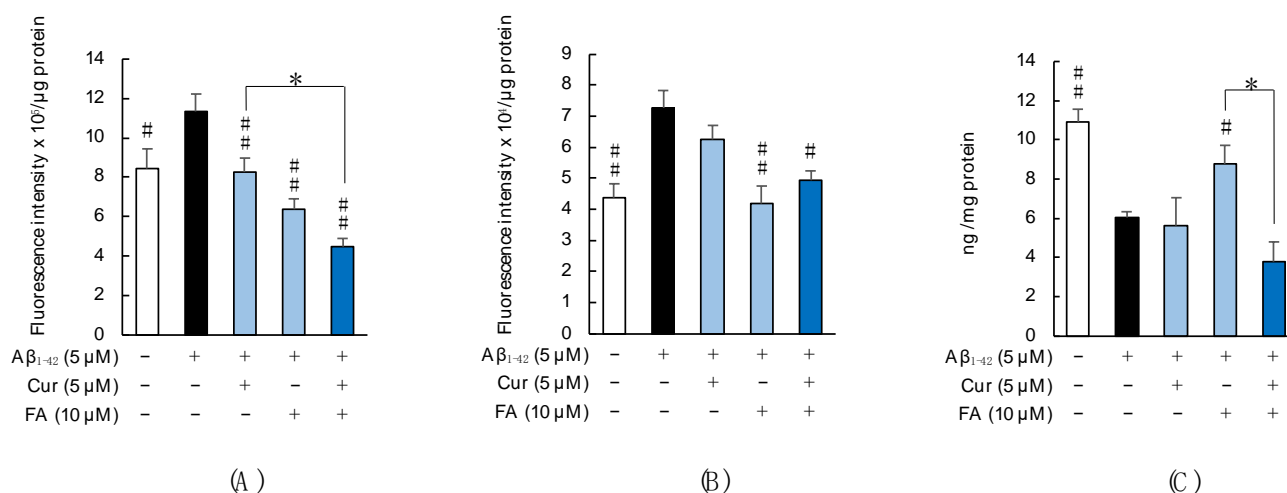

Suppl. Figure S2. Effect of Cur, FA, or a combination of both on ROS generation, mitochondrial ROS and Mn-SOD in Aβ<sub>1-42</sub>-stimulated SH-SY5Y cells. The generation of ROS (A), mitochondrial ROS level (B), Mn-SOD levels (C) in SH-SY5Y cells exposed with 5 μM Aβ<sub>1-42</sub> and treated with Aβ<sub>1-42</sub> + 5 μM Cur, Aβ<sub>1-42</sub> + 10 μM FA or Aβ<sub>1-42</sub> + Cur + FA. +: inclusion of 5 μM Aβ<sub>1-42</sub>, 1 μM Cur, 10 μM FA, respectively, -: non-inclusion. The p-values in ANOVA were < 0.001. Each value expresses the mean + S.E.M. of at least 3 in-dependent experiments. #, p < 0.05; ##, p < 0.01 for Aβ<sub>1-42</sub> exposed cells versus the other treated cells (n = 6, Tukey); \*, p < 0.01 for Aβ<sub>1-42</sub> + Cur + FA-treated cells versus Cur or FA-treated cells (n = 6, Tukey).

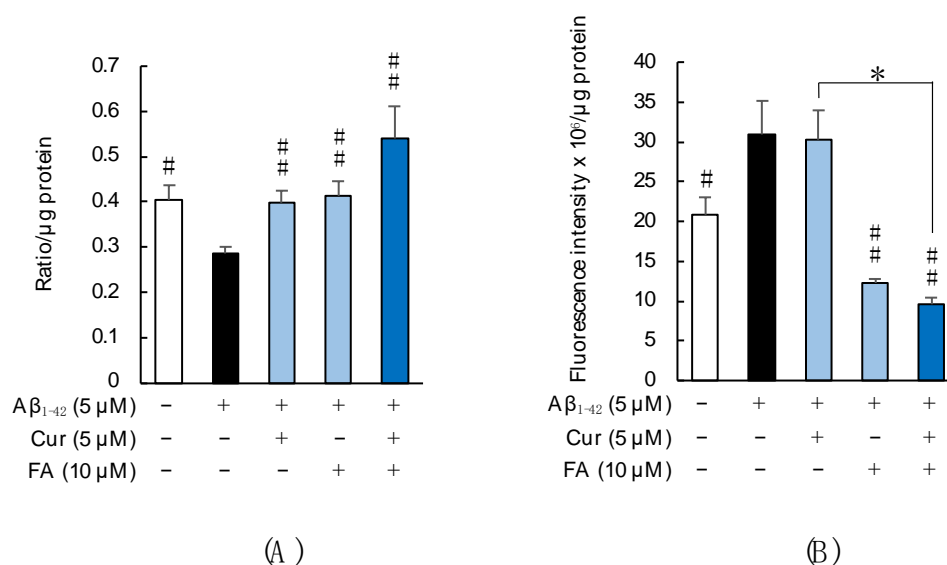

Suppl. Figure S3. Effect of Cur, FA, or a combination of both on membrane integrity in  $A\beta_{1-42}$ -stimulated SH-SY5Y cells. The fluidity (A) and phospholipid peroxidation (B) of cell membranes in SH-SY5Y cells exposed with 5 μM  $A\beta_{1-42}$  and treated with  $A\beta_{1-42}$  + 5 μM Cur,  $A\beta_{1-42}$  + 10 μM FA or  $A\beta_{1-42}$  + Cur + FA.

+: inclusion of 5 μM  $A\beta_{1-42}$ , 1 μM Cur, 10 μM FA, respectively, -: non-inclusion. The p-values in ANOVA were  $< 0.001$ . Each value expresses the mean + S.E.M. of at least 3 independent experiments.

#,  $p < 0.05$ ; ##,  $p < 0.01$  for  $A\beta_{1-42}$  exposed cells versus the other treated cells (n = 6, Tukey); \*,  $p < 0.001$  for  $A\beta_{1-42}$  + Cur + FA-treated cells versus Cur-treated cells (n = 6, Tukey).

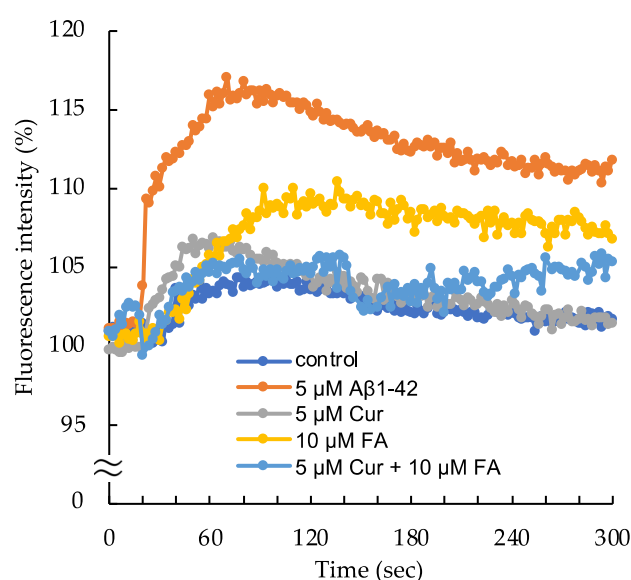

Suppl. Figure S4. Detection of changes in intracellular ionized calcium concentration ( $[Ca^{2+}]_i$ ) in SH-SY5Y cells.

Changes in  $[Ca^{2+}]_i$  were measured for fluorescence intensity in cells exposed to 5 μM  $A\beta_{1-42}$  and cells treated with  $A\beta_{1-42}$  + 5 μM Cur,  $A\beta_{1-42}$  + FA, or  $A\beta_{1-42}$  + 5 μM Cur + FA. The control fluorescence intensity added with 20 mM HEPES and 1 × Hank's Balanced Salt solution. The fluorescence intensity was evaluated with the value at on-set as 100 %.
